# Supplementary material
Source: publisher figshare collection journal article supplement (https://diabetesjournals.figshare.com/ndownloader/files/25774655)

Supplementary Figure S1: Interquartile ranges for Fasting Day-of-Surgery and Postoperative Day 1 Median Glucose values. Pathway/Intervention Group= Blue; Matched Cohort=red. Values are displayed as median values.


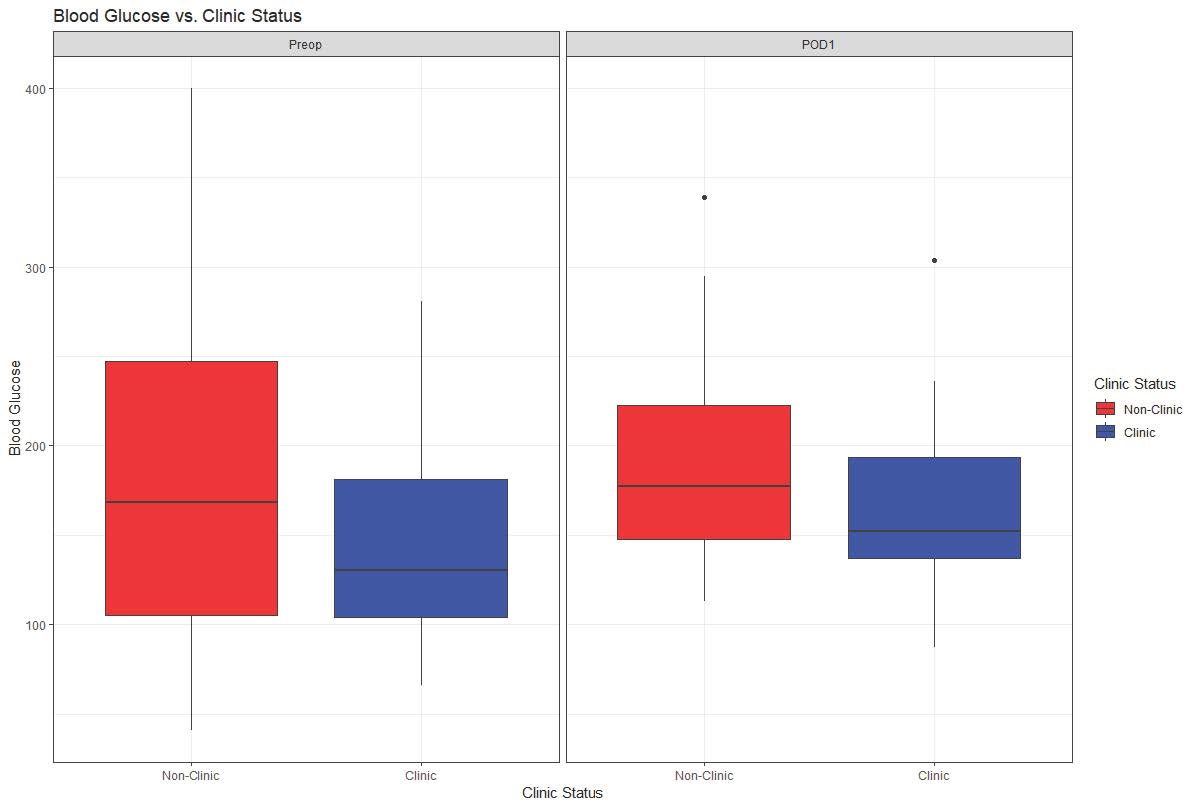

Supplement: Supplementary file 1 [file 25774655]
